# Supplementary material for: Microbially induced potassium enrichment in Paleoproterozoic shales and implications for reverse weathering on early Earth
Source: PubMed Central journal article supplement (PMC6572813; doi:10.1038/s41467-019-10620-3), 2019-06-17
Supplement: 41467_2019_10620_MOESM1_ESM.pdf [file 41467_2019_10620_MOESM1_ESM.pdf]

## **Supplementary Information**

### **Microbially induced potassium enrichment in Paleoproterozoic shales and implications for reverse weathering on early Earth**

Authors:

Jérémie Aubineau et al.

## Supplementary Note 1

### Geochemical comparisons of selected major elements between MRS and host sediments.

$\text{Al}_2\text{O}_3$  content reveals a negative relationship with  $\text{SiO}_2$  in terms of clastic grain size (Supplementary Fig. 4a), with shales being more aluminous than sandstone. This is to be expected, but surprisingly, non-pyritized MRS also have a higher  $\text{SiO}_2$  content and  $\text{K}_2\text{O}/\text{SiO}_2$  ratio than pyritized MRS (Fig. 3), indicating that quartz dilution is unlikely. Moreover, the Francevillian FB<sub>2</sub> Member shales do not contain silica excess with respect to the average shale (Supplementary Table 1)<sup>1</sup>, inconsistent with extensive silicification during early diagenesis.  $\text{Al}_2\text{O}_3$  displays a positive correlation with  $\text{K}_2\text{O}$  in pyritized MRS and host sediments, but shows no trend for non-pyritized MRS (Supplementary Fig. 4b), suggesting the presence of K-poor clays. Lithologies show different  $\text{K}_2\text{O}$  and  $\text{Na}_2\text{O}$  relationships, but, on the average,  $\text{K}_2\text{O}$  and  $\text{Na}_2\text{O}$  contents co-vary (Supplementary Fig. 4c), consistent with a similar relationship shown by chemical analyses of fine-grained illite<sup>2</sup>. MgO exhibits no significant correlation with  $\text{Al}_2\text{O}_3$  (Supplementary Fig. 4d), indicating the presence of Mg-bearing carbonate and/or Mg-poor phyllosilicates. Collectively, these binary plots highlight that the variations in major element content are controlled by mineralogy (*e.g.*, type of detrital and/or authigenic clays present in lithologies).

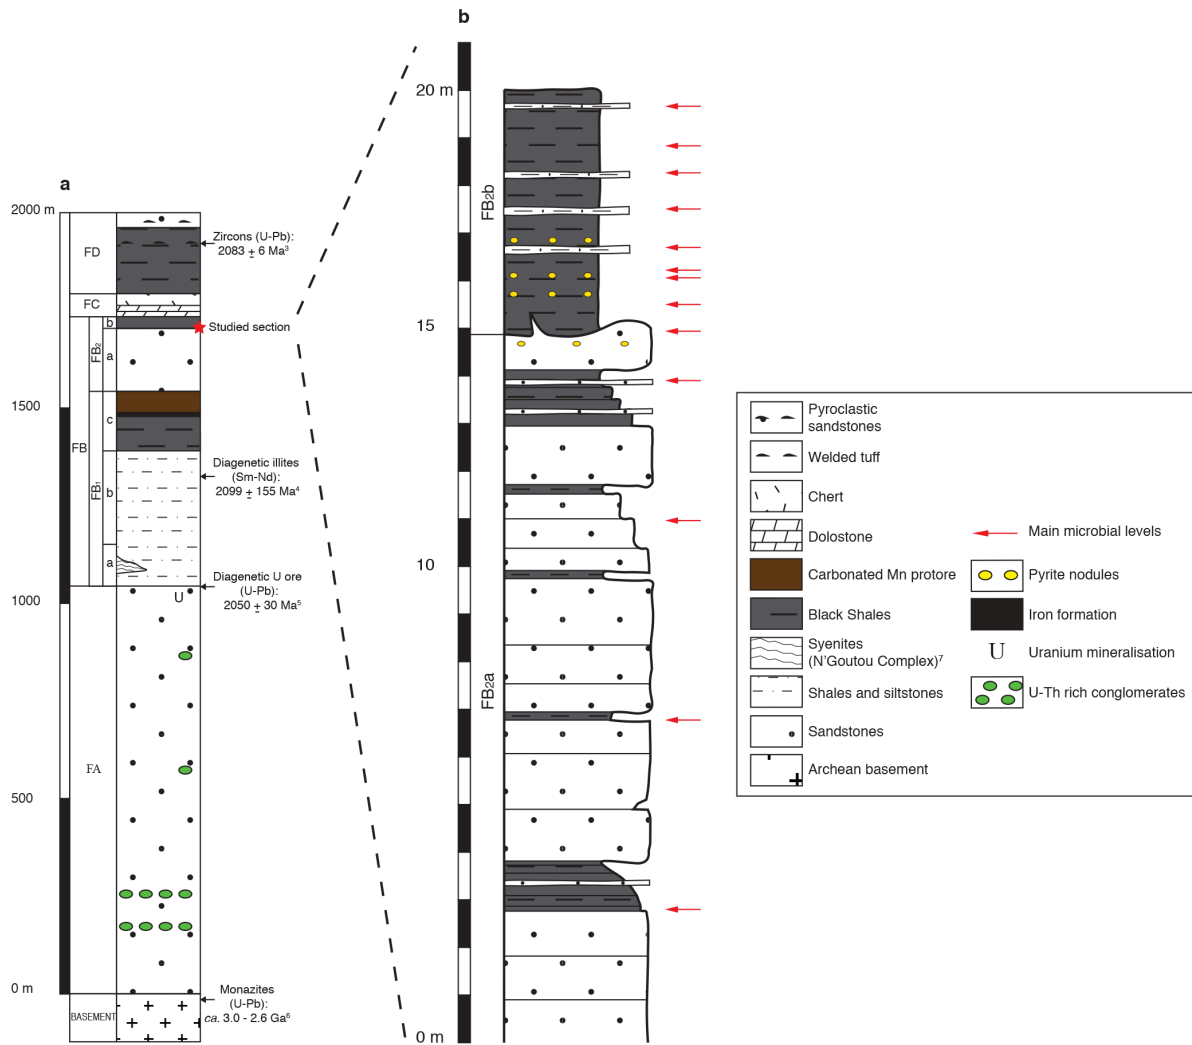

**Supplementary Figure 1 | Lithostratigraphic columns for the Francevillian basin. a,** Lithostratigraphy of the Paleoproterozoic Francevillian Series that comprises four sedimentary formations. **b,** Composite stratigraphic section of the FB<sub>2</sub> Member in the studied area. It consists of the 15 m thick coarse-grained sandstone conformably underlying the 5 m thick black shale sequence (<sup>3</sup>Horie *et al.*, 2005; <sup>4</sup>Bros *et al.*, 1992; <sup>5</sup>Gancarz, 1978; <sup>6</sup>Mouélé *et al.*, 2014; <sup>7</sup>Gauthier-Lafaye and Weber, 2003).

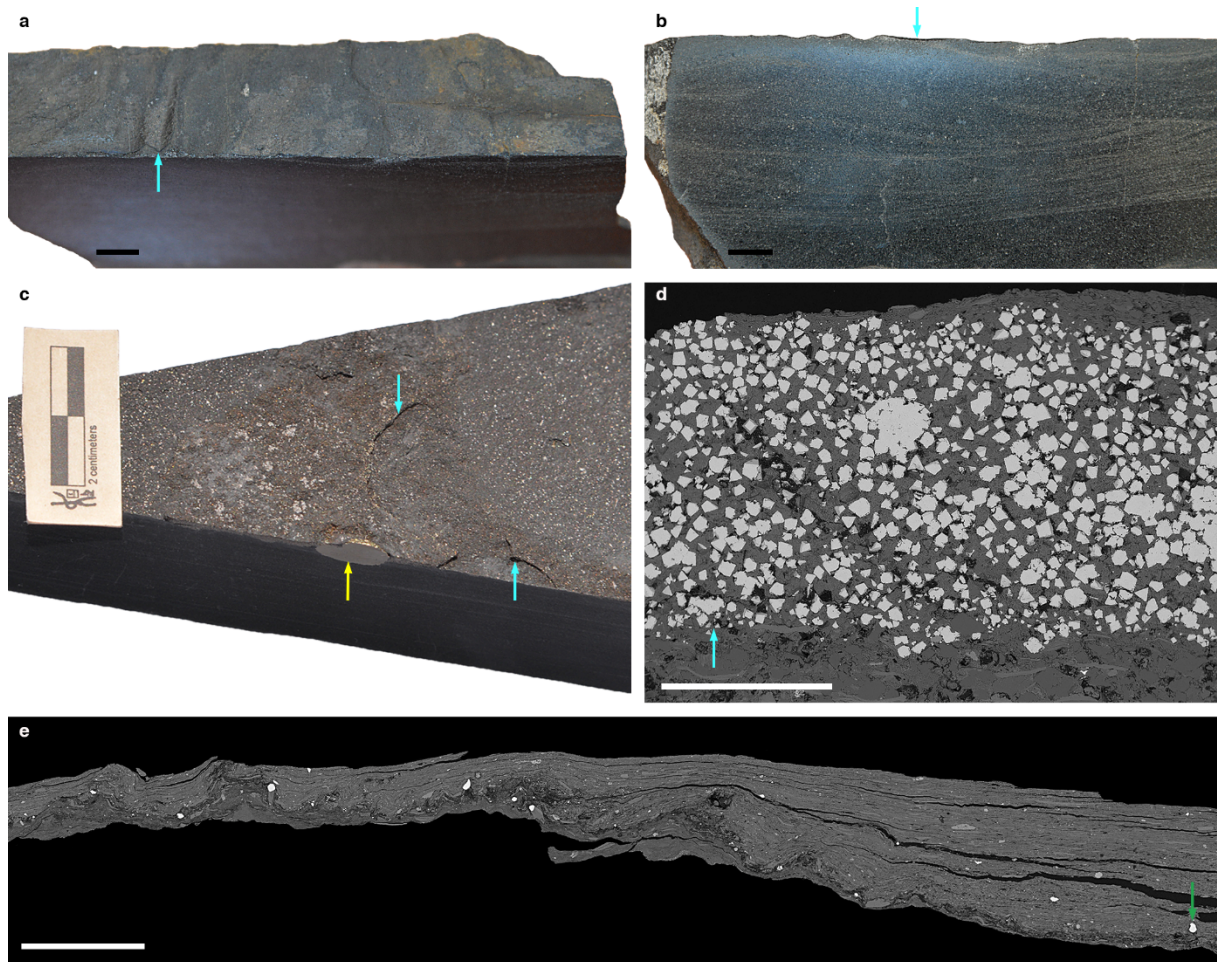

**Supplementary Figure 2 | Microbial mat laminae and their host sediments.** **a**, A  $\mu\text{m}$ -thick mat-related structure preserved as wrinkle on the top of the sandstone bed. **b**, Polished slab section of **a**. **c**, Pyritized microbial mat from the black shale facies. **d**, SEM imaging of **c**. Note extensively developed euhedral pyrite, making difficult to separate black shale from pyritized mat structures. **e**, SEM image of a thinly laminated mat from the top of the sandstone bed. Note the microtexture of mat laminae. Blue, yellow, and green arrows point to the thin biofilm layers, macrofossil<sup>8,9</sup>, and heavy minerals, respectively. Scale bars are 1 cm (**a**, **b**), and 0.5 mm (**d**, **e**).

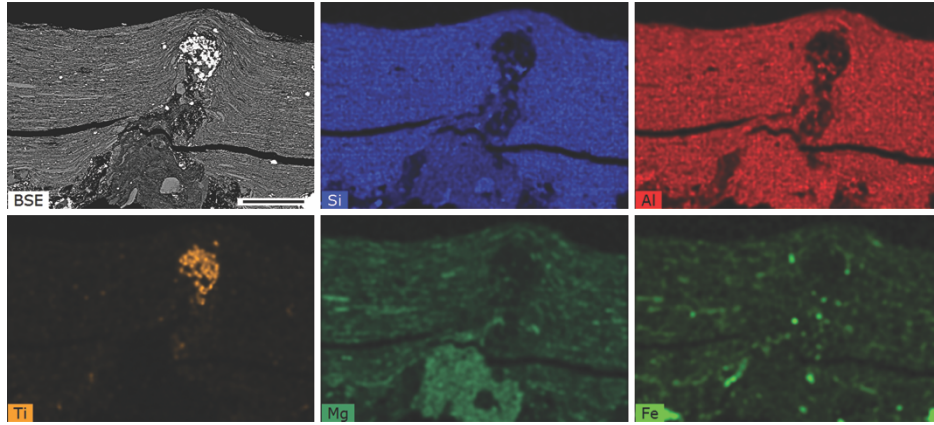

**Supplementary Figure 3 | Petrography, SEM, and EDX of bubble-like features in cross-section perpendicular to the bedding plane.** Back-scattered electron (BSE) and composite (Si, Al, Ti, Mg, and Fe) elemental maps show mineral composition of circular structures within the MRS. The cone-like structure mainly consists of Al- and Mg-rich clays. Scale bar is 200  $\mu\text{m}$ .

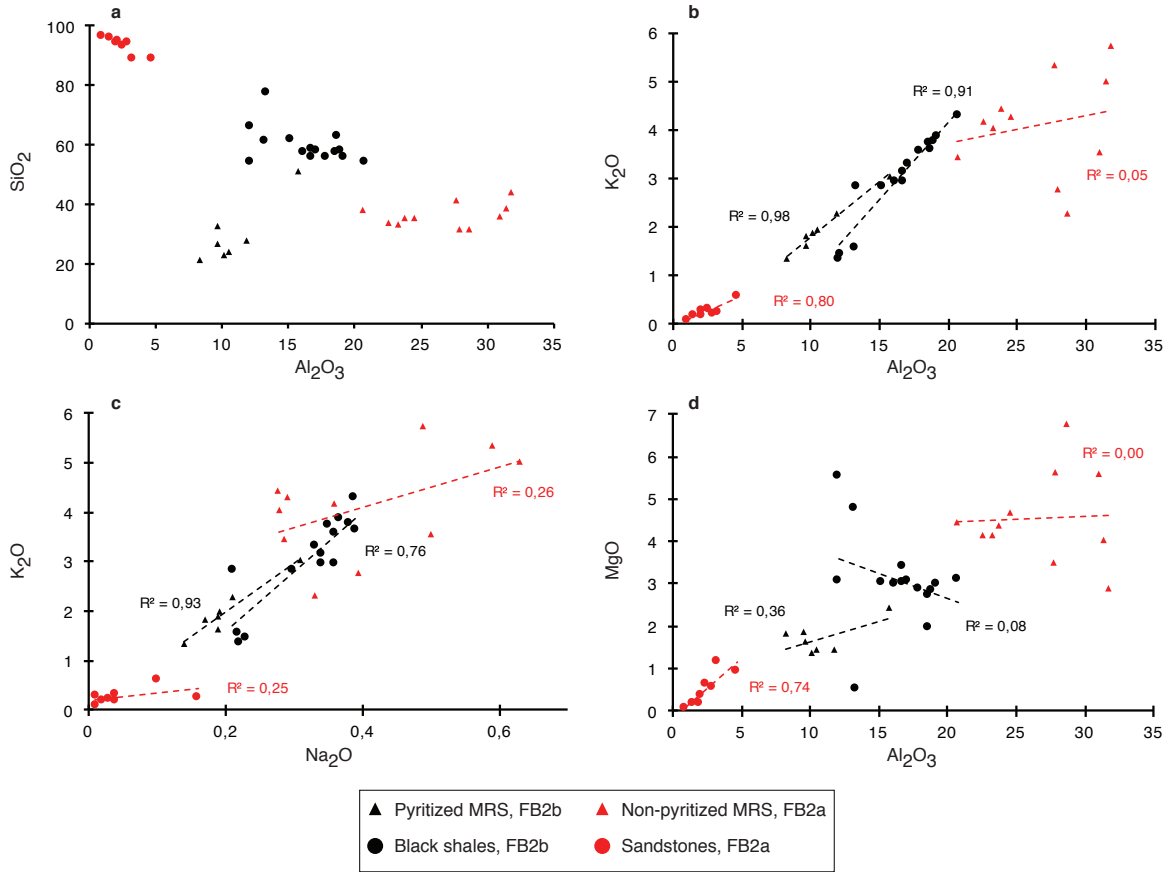

**Supplementary Figure 4 | Cross plots of selected major elements. a,  $\text{SiO}_2$  vs.  $\text{Al}_2\text{O}_3$ . b,  $\text{K}_2\text{O}$  vs.  $\text{Al}_2\text{O}_3$ . c,  $\text{K}_2\text{O}$  vs.  $\text{Na}_2\text{O}$ . d,  $\text{MgO}$  vs.  $\text{Al}_2\text{O}_3$ .**

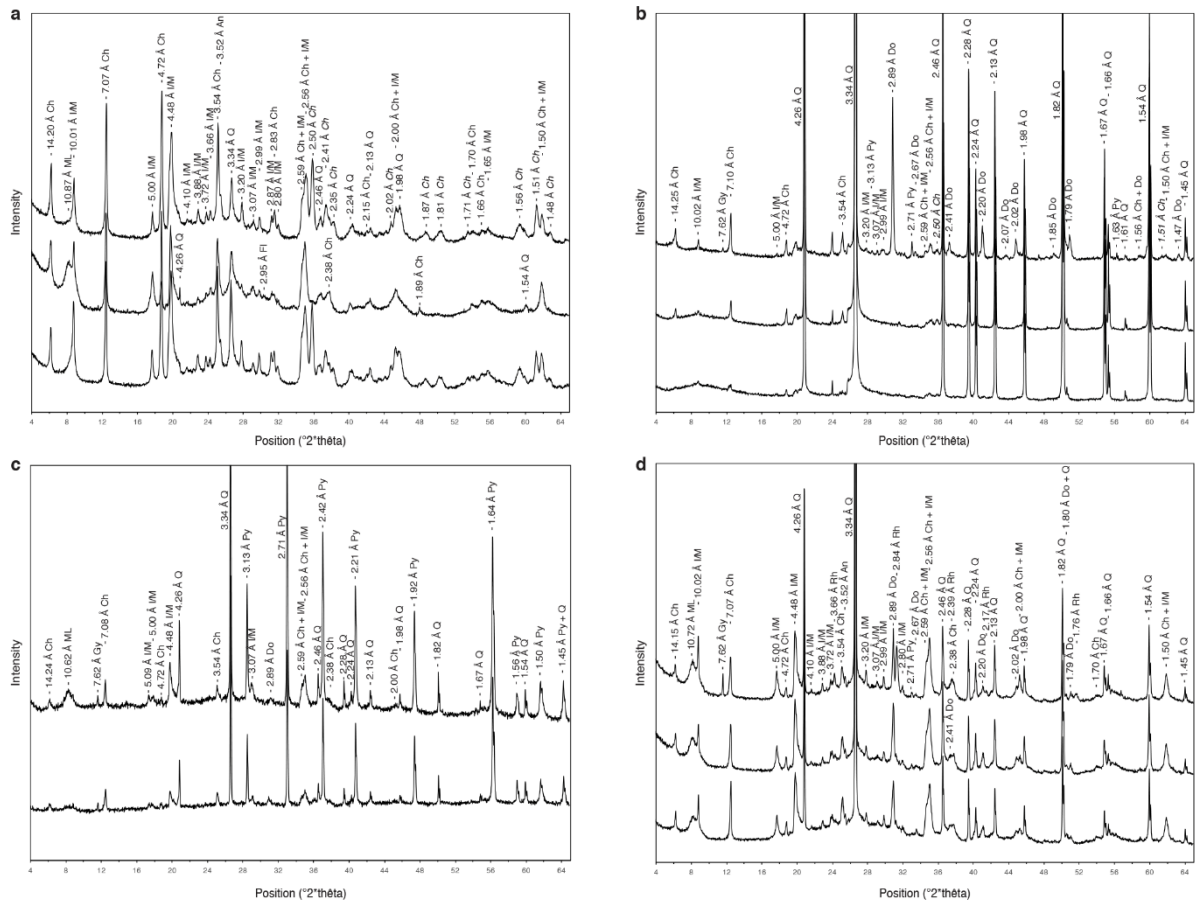

**Supplementary Figure 5 | XRD patterns of representative randomly oriented powders. a**, Non-pyritized microbial mats. **b**, Sandstones. **c**, Pyritized biofilms. **d**, Black shales. [Chlorite (Ch); Mixed-layer (ML); Illite/mica (I/M); Quartz (Q); Anatase (An); Florencite (Fl); Di-tri-octahedral chlorite<sup>10</sup> (Ch); Gypsum (Gy); Pyrite (Py); Dolomite (Do); Rhodochrosite (Rh)].

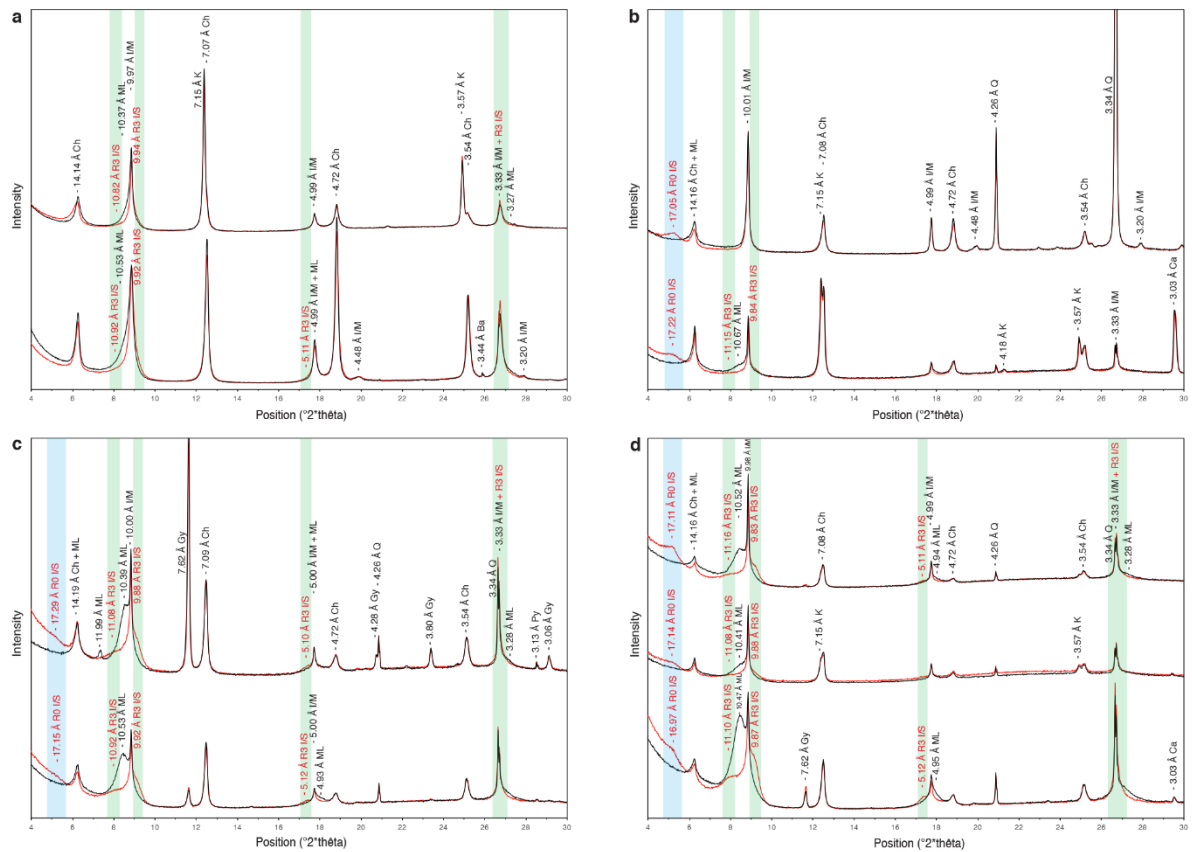

**Supplementary Figure 6 | XRD patterns of representative oriented <2 μm clay fraction after air-dried treatment (black lines) and glycolation (red lines). a, Non-pyritized microbial mats. b, Sandstones. c, Pyritized biofilms. The weak signature of short-range ordered I-S MLMs likely indicates contamination from the underlying host sediment. d, Black shales. [Green areas correspond to long-range ordered (R3) I-S MLMs; Blue areas represent the randomly ordered (R0) I-S MLMs; Chlorite (Ch); Mixed-layer (ML); Illite/mica (I/M); Kaolinite (K); Quartz (Q); Barite (Ba); Calcite (Ca); Gypsum (Gy)].**



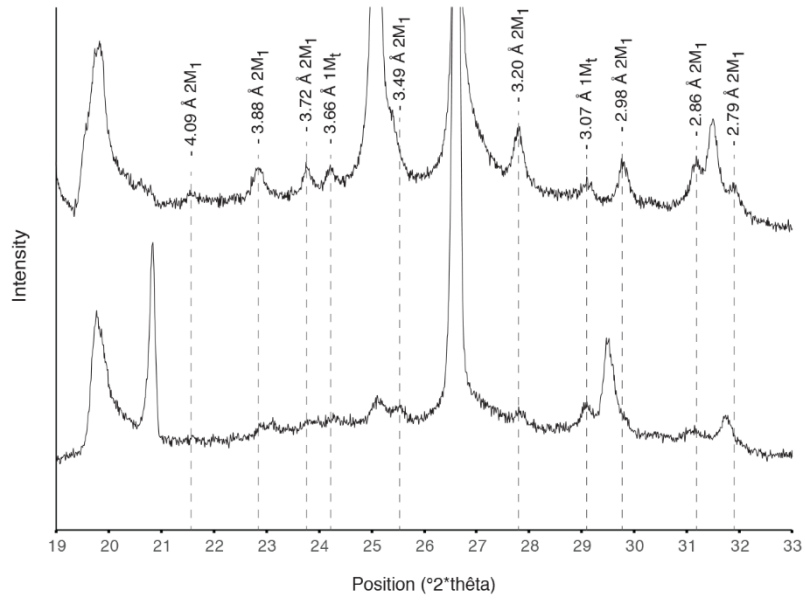

**Supplementary Figure 7 | XRD patterns of randomly oriented powders (<2 μm clay fraction) for the MRS and host sediment are shown at the top and bottom, respectively. The *hkl* diffraction peaks are typical of illite polytypes with 2M<sub>1</sub> and 1M<sub>t</sub> polytypes, representing detrital and diagenetic illites, respectively.**

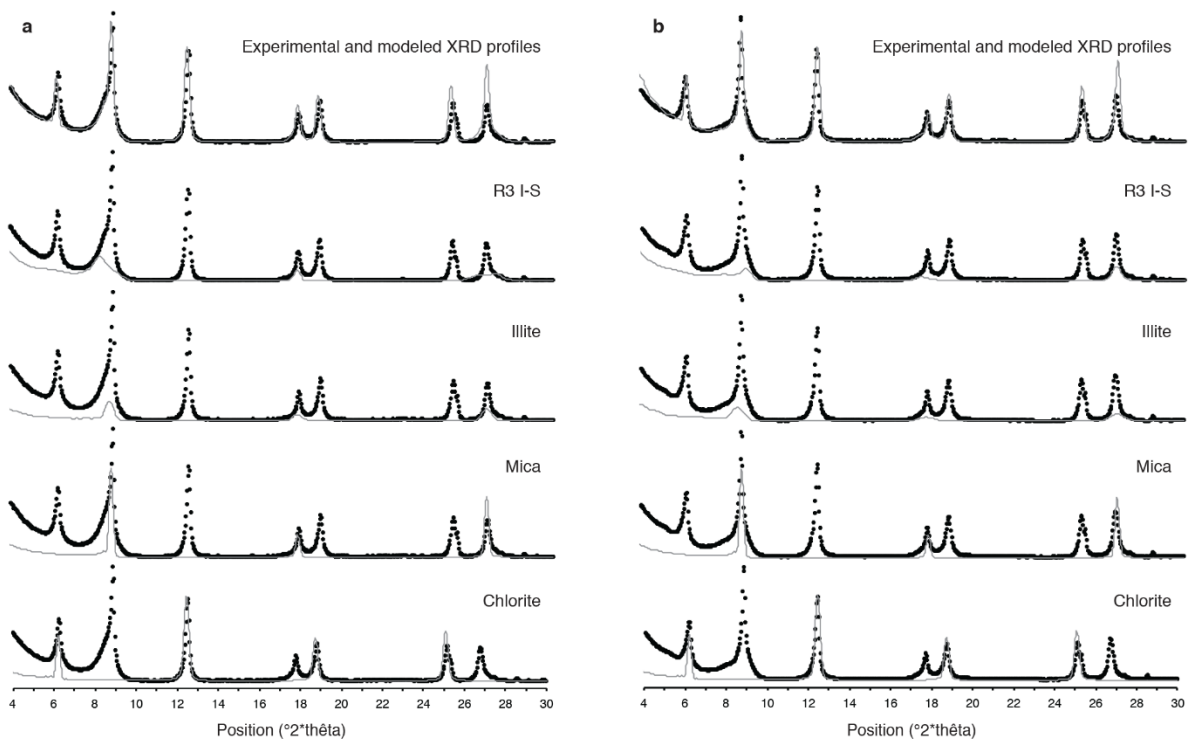

**Supplementary Figure 8 | Experimental (crosses) and modeled (lines) XRD profiles of selected Ca-saturated MRS samples. Contribution of different minerals to the profiles is indicated. a, After air-dried preparation. b, After ethylene-glycol saturation.**

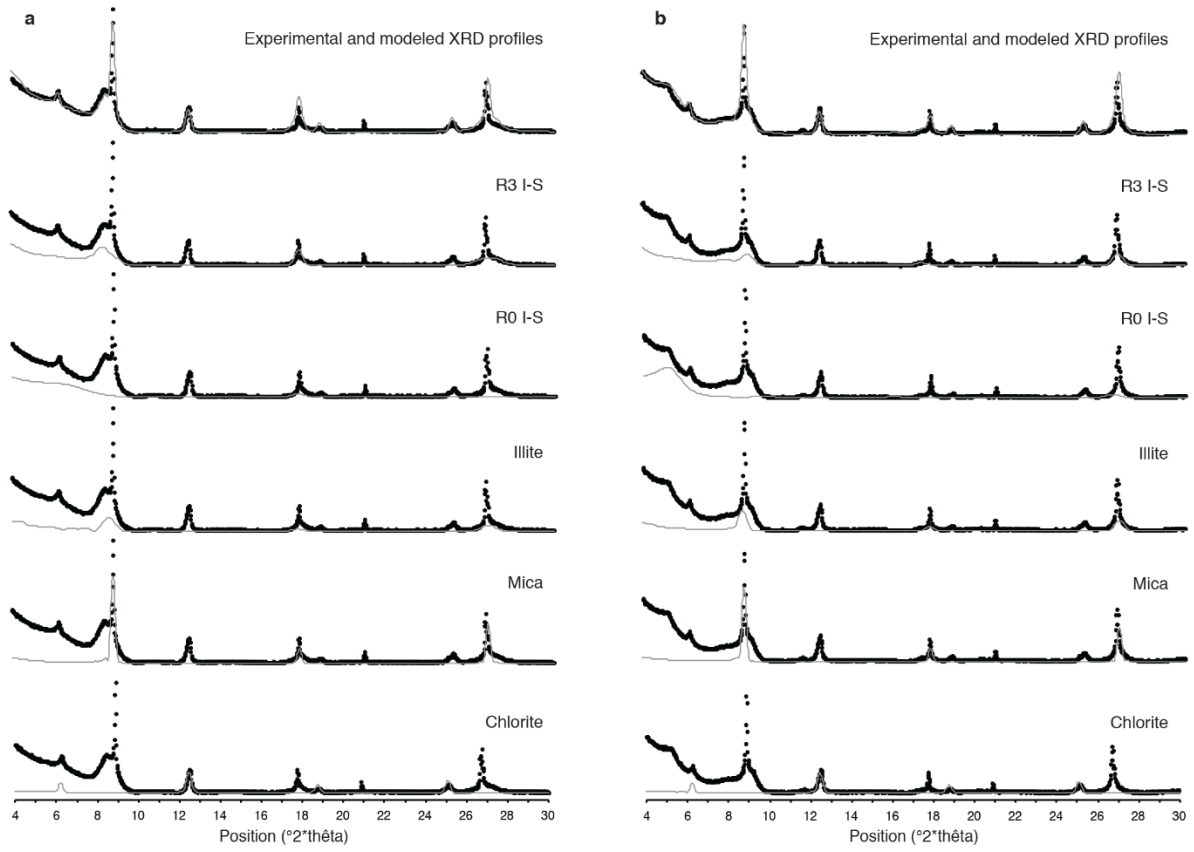

**Supplementary Figure 9 | Experimental (crosses) and modeled (lines) XRD profiles of Ca-saturated host sediments. Contribution of different minerals to the profiles is indicated. a, After air-dried preparation. b, After ethylene-glycol saturation.**

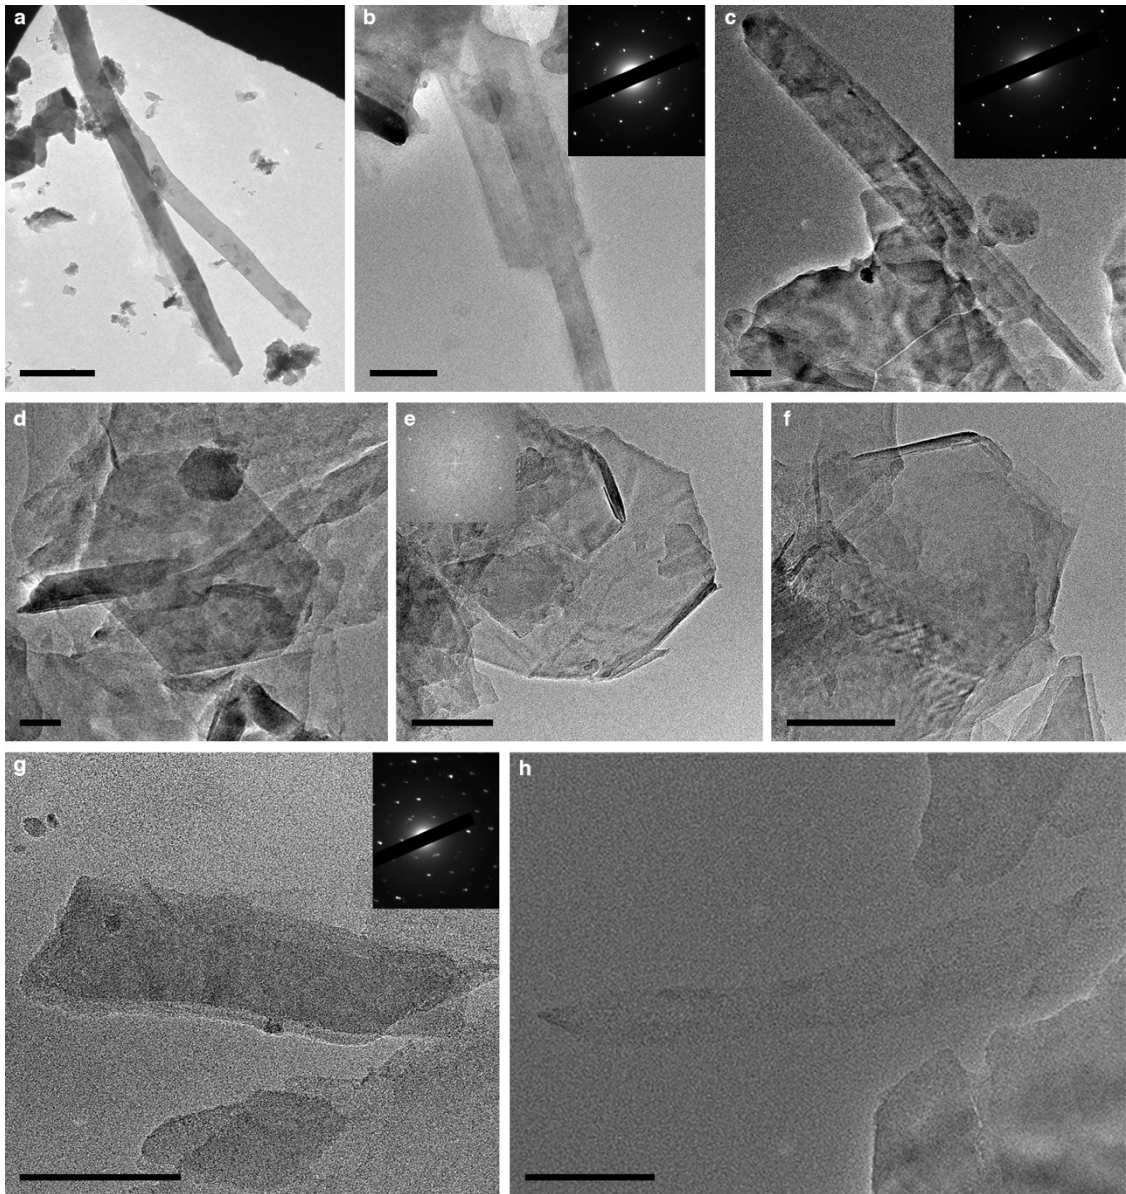

**Supplementary Figure 10 | Transmission-electron images of illite minerals.** **a-c**, Lath-shaped crystals from MRS. **d-f**, Hexagonal-shaped crystals observed in MRS. **g-h**, Lathlike and tiny lath-shaped crystals from host sediments. Scale bars are 2000 nm (**a**), 500 nm (**b**), 100 nm (**c-g**), 50 nm (**h**). The inset with Selected Area Electron Diffraction (SAED) pattern shows a hexagonal structure typical of phyllosilicates in  $(hk0)$  reflection.

**Supplementary Table 1 | Whole-rock geochemical data of major elements and carbon.**

| Formation  | Lithology         | Sample ID  | Depth<br>m | SiO <sub>2</sub><br>% | Al <sub>2</sub> O <sub>3</sub><br>% | Fe <sub>2</sub> O <sub>3</sub><br>% | MnO<br>% | MgO<br>% | CaO<br>%    | Na <sub>2</sub> O<br>% | K <sub>2</sub> O<br>% | TiO <sub>2</sub><br>% | P <sub>2</sub> O <sub>5</sub><br>% | S <sub>tot</sub><br>wt% | C <sub>tot</sub><br>wt% | C <sub>org</sub> *<br>wt% |
|------------|-------------------|------------|------------|-----------------------|-------------------------------------|-------------------------------------|----------|----------|-------------|------------------------|-----------------------|-----------------------|------------------------------------|-------------------------|-------------------------|---------------------------|
| FB2b       | Pyritized<br>MRS  | FPS_s5-mat | 1,3        | 23.2                  | 10.1                                | 38.4                                | 0.1      | 1.35     | 0.59        | 0.19                   | 1.88                  | 0.14                  | BDL                                | 29.37                   | 0.69                    | 0.56                      |
|            |                   | DB_s4-mat  | 2,9        | 32.87                 | 9.71                                | 29.74                               | 0.16     | 1.63     | 1.27        | 0.17                   | 1.81                  | 0.18                  | BDL                                | 22.02                   | 3.12                    | 2.85                      |
|            |                   | FPS_s4-mat | 3,7        | 21.23                 | 8.26                                | 41.49                               | 0.09     | 1.81     | 0.81        | 0.14                   | 1.34                  | 0.12                  | BDL                                | 24.81                   | 0.77                    | 0.59                      |
|            |                   | FPS_s3-mat | 3,8        | 26.69                 | 9.62                                | 35.26                               | 0.12     | 1.87     | 0.86        | 0.19                   | 1.62                  | 0.15                  | BDL                                | 28.45                   | 1.36                    | 1.18                      |
|            |                   | DB_s3-mat  | 4          | 24.17                 | 10.5                                | 29.86                               | 0.08     | 1.44     | 0.85        | 0.19                   | 1.97                  | 0.15                  | BDL                                | 26.9                    | 0.53                    | 0.35                      |
|            |                   | DB_s2-mat  | 4          | 27.84                 | 11.83                               | 20.82                               | 0.07     | 1.44     | 0.51        | 0.21                   | 2.28                  | 0.2                   | BDL                                | 23.88                   | X                       | X                         |
|            |                   | FR_s1-mat  | 4          | 51.3                  | 15.74                               | 10.33                               | 0.24     | 2.43     | 2.08        | 0.31                   | 3.04                  | 0.34                  | BDL                                | 6.46                    | 3.52                    | 3.08                      |
|            | Black<br>shales   | WS_s1-sed  | 0,3        | 58.93                 | 16.69                               | 3.69                                | 0.49     | 3.43     | 2.26        | 0.34                   | 2.95                  | 0.33                  | BDL                                | 0.09                    | 2.2                     | 1.72                      |
|            |                   | KS_s1-sed  | 1          | 61.85                 | 15.14                               | 3.81                                | 0.23     | 3.02     | 2.07        | 0.3                    | 2.83                  | 0.42                  | 0.2                                | 0.09                    | 2.91                    | 2.47                      |
|            |                   | FPS_s5-sed | 1,3        | 56.35                 | 16.72                               | 2.39                                | 0.47     | 3.03     | 2.65        | 0.34                   | 3.16                  | 0.39                  | 0.16                               | 0.22                    | 4.98                    | 4.41                      |
|            |                   | AFBSO-12   | 1,4        | 62.88                 | 18.65                               | 3.44                                | 0.07     | 1.96     | 0.37        | 0.39                   | 3.63                  | 0.41                  | 0.17                               | X                       | X                       | X                         |
|            |                   | MLS_s7-sed | 1,9        | 61.55                 | 13.22                               | 6.99                                | 0.22     | 4.77     | 2.24        | 0.22                   | 1.57                  | 0.37                  | BDL                                | 0.32                    | 2.11                    | 1.63                      |
|            |                   | AFBSO-9    | 2,5        | 54.74                 | 12.06                               | 6.5                                 | 0.74     | 5.55     | 5.21        | 0.23                   | 1.47                  | 0.32                  | 0.12                               | X                       | 3.8                     | 2.68                      |
|            |                   | DB_s4-sed  | 2,9        | 58.09                 | 17.07                               | 2.81                                | 0.44     | 3.06     | 2.67        | 0.33                   | 3.32                  | 0.39                  | 0.13                               | 0.13                    | 3.83                    | 3.26                      |
|            |                   | AFBSO-7    | 3,5        | 77.68                 | 13.28                               | 0.35                                | BDL      | 0.53     | BDL         | 0.21                   | 2.84                  | 0.29                  | BDL                                | X                       | 2.47                    | 2.47                      |
|            |                   | FPS_s4-sed | 3,7        | 57.81                 | 18.6                                | 2.2                                 | 0.26     | 2.74     | 2.07        | 0.35                   | 3.73                  | 0.39                  | 0.16                               | 0.16                    | 2.62                    | 2.18                      |
|            |                   | FPS_s3-sed | 3,8        | 57.66                 | 16.08                               | 2.34                                | 0.31     | 2.99     | 2.59        | 0.36                   | 2.95                  | 0.38                  | 0.16                               | 0.17                    | 5.04                    | 4.48                      |
|            |                   | AFBSO-6    | 3,9        | 66.18                 | 12.04                               | 8.87                                | 0.11     | 3.09     | 0.24        | 0.22                   | 1.35                  | 0.26                  | 0.15                               | X                       | 3.64                    | 3.59                      |
|            |                   | DB_s2-sed  | 4          | 56.11                 | 17.85                               | 2.15                                | 0.3      | 2.87     | 2.24        | 0.36                   | 3.59                  | 0.39                  | BDL                                | 0.16                    | 4.59                    | 4.11                      |
|            |                   | FR_s1-sed  | 4          | 58.3                  | 18.86                               | 2.36                                | 0.24     | 2.86     | 2.18        | 0.38                   | 3.79                  | 0.4                   | 0.14                               | 0.2                     | 2.73                    | 2.26                      |
| MLS_s8-sed | 4,5               | 54.3       | 20.73      | 3.87                  | 0.48                                | 3.1                                 | 2.1      | 0.39     | 4.3         | 0.44                   | BDL                   | 1.02                  | 1.86                               | 1.41                    |                         |                           |
| MLS_s9-sed | 4,5               | 56.29      | 19.14      | 3.02                  | 0.37                                | 2.99                                | 2.09     | 0.37     | 3.87        | 0.41                   | BDL                   | 0.34                  | 1.77                               | 1.32                    |                         |                           |
| FB2a       | Non-<br>pyritized | MLS_s1-mat | 5          | 33.74                 | 22.58                               | 13.1                                | 0.32     | 4.13     | 1.01        | 0.36                   | 4.17                  | 2.77                  | 0.56                               | 4.16                    | 5.84                    | 5.63                      |
|            |                   | LP_s3-mat  | 5          | 41.35                 | 27.69                               | 5.03                                | 0.1      | 3.5      | 0.34        | 0.59                   | 5.34                  | 1.91                  | 0.34                               | 0.19                    | 3.74                    | 3.67                      |
|            | MRS               | MLS_s2-mat | 5          | 33.09                 | 23.3                                | 9.45                                | 0.1      | 4.12     | 0.43        | 0.28                   | 4.04                  | 3.39                  | 0.36                               | 3.08                    | 9.69                    | 9.6                       |
|            |                   | MLS_s3-mat | 5          | 38.3                  | 20.66                               | 13.32                               | 0.16     | 4.45     | 0.79        | 0.29                   | 3.46                  | 2.34                  | 0.65                               | 2.61                    | 4.44                    | 4.27                      |
|            |                   | MLS_s4-mat | 5          | 35.62                 | 23.78                               | 5.69                                | 0.11     | 4.35     | 0.68        | 0.28                   | 4.44                  | 3.21                  | 0.51                               | 0.36                    | 10.59                   | 10.44                     |
|            |                   | MLS_s5-mat | 5          | 35.56                 | 24.54                               | 6.41                                | 0.09     | 4.67     | 0.6         | 0.29                   | 4.29                  | 3.13                  | 0.49                               | 0.42                    | 9                       | 8.87                      |
|            |                   | EST_s3-mat | 5          | 31.67                 | 27.89                               | 3.47                                | 0.03     | 5.62     | 0.03        | 0.4                    | 2.78                  | 0.37                  | 0.1                                | 0.36                    | 16.97                   | 16.96                     |
|            |                   | EST_s4-mat | 5          | 31.66                 | 28.67                               | 4.25                                | 0.05     | 6.76     | 0.03        | 0.33                   | 2.3                   | 0.23                  | 0.05                               | 0.29                    | X                       | X                         |
|            |                   | MLS_s3-mat | 9          | 44.31                 | 31.77                               | 2.48                                | 0.03     | 2.9      | 0.16        | 0.49                   | 5.74                  | 0.87                  | 0.12                               | 0.84                    | 1.6                     | 1.57                      |
|            |                   | EST_s1-mat | 13,2       | 36.27                 | 31                                  | 2.72                                | 0.01     | 5.57     | 0.1         | 0.5                    | 3.56                  | 0.36                  | 0.02                               | 0.17                    | 11.09                   | 11.07                     |
|            |                   | EST_s2-mat | 13,2       | 38.54                 | 31.4                                | 2.48                                | 0.02     | 4.03     | 0.2         | 0.63                   | 5.01                  | 0.33                  | 0.17                               | 0.15                    | X                       | X                         |
|            |                   | Sandstones | MLS_s1-sed | 5                     | 89.24                               | 4.66                                | 0.97     | 0.11     | 0.96        | 0.65                   | 0.1                   | 0.6                   | 0.03                               | BDL                     | X                       | 0.45                      |
|            | LP_s3-sed         |            | 5          | 93.65                 | 2.46                                | 0.66                                | 0.07     | 0.63     | 0.6         | 0.04                   | 0.32                  | BDL                   | BDL                                | X                       | 0.52                    | 0.39                      |
|            | MLS_s2-sed        |            | 5          | 89.25                 | 3.21                                | 0.79                                | 0.27     | 1.17     | 1.22        | 0.16                   | 0.27                  | 0.03                  | BDL                                | X                       | 0.83                    | 0.57                      |
|            | AFBSO-3           |            | 5          | 96.83                 | 0.95                                | 0.08                                | 0.01     | 0.08     | BDL         | <i>0.01</i>            | 0.08                  | 0.02                  | BDL                                | X                       | 0.36                    | 0.36                      |
|            | LP_s2-sed         |            | 6          | 95.03                 | 2.08                                | 0.56                                | 0.01     | 0.39     | 0.06        | 0.04                   | 0.19                  | 0.02                  | 0.03                               | X                       | 0.31                    | 0.3                       |
|            | MLS_s3-sed        |            | 9          | 94.48                 | 2.85                                | 0.68                                | 0.03     | 0.58     | BDL         | 0.03                   | 0.21                  | 0.04                  | BDL                                | X                       | 0.42                    | 0.42                      |
| EST_s1-sed | 13,2              |            | 94.74      | 1.99                  | 0.57                                | BDL                                 | 0.2      | BDL      | <i>0.01</i> | 0.28                   | BDL                   | BDL                   | 0.02                               | 0.58                    | 0.58                    |                           |
| EST_s2-sed | 13,2              | 95.98      | 1.47       | 0.63                  | BDL                                 | 0.17                                | 0.07     | 0.02     | 0.18        | 0.02                   | 0.07                  | X                     | X                                  | X                       |                         |                           |

FPS: flat pyritized mat; LP: linear pattern; DB: domal buildup; WS: wrinkle structure; KS: “kinneyia” structure; MLS: mat-layer structure; FR: “fairy-ring” structure; EST: “elephant-skin” texture<sup>11</sup>.

BLD: below detection limit. Italicized numbers reflect samples where half or more of the analyses were below detection limits for that element.

Organic carbon is calculated as follow:  $C_{org} \approx C_{tot} - (12 * CaO / 56)$ ;  $C_{org} = C_{tot}$  when CaO contents < BLD.

X: Not analysed

**Supplementary Table 2 | Pairwise comparisons between all pairs of groups.**

---

|                          | Pyritized MRS<br>(FB2b)     | Black shales<br>(FB2b)      | Non-pyritized MRS<br>(FB2a) | Sandstones<br>(FB2a) |
|--------------------------|-----------------------------|-----------------------------|-----------------------------|----------------------|
| Pyritized MRS (FB2b)     | -                           |                             |                             |                      |
| Black shales (FB2b)      | <b>0.008</b>                | -                           |                             |                      |
| Non-pyritized MRS (FB2a) | <b>8.0*10<sup>-05</sup></b> | <b>4.9*10<sup>-10</sup></b> | -                           |                      |
| Sandstones (FB2a)        | <b>3.0*10<sup>-08</sup></b> | <b>2.9*10<sup>-06</sup></b> | <b>1.0*10<sup>-14</sup></b> | -                    |

---

p-value are given. Bold p-value (< 0.05) are significant.

**Supplementary Table 3 | Structural parameters from the simulation of experimental XRD patterns of Ca-saturated samples after air-dried treatment and glycolation.**

| Samples  | Chlorite     |       | Mica         |       | Illite       |                        | Random MLM   |      |                     |   | Ordered MLM  |                          |                         |   |
|----------|--------------|-------|--------------|-------|--------------|------------------------|--------------|------|---------------------|---|--------------|--------------------------|-------------------------|---|
|          | Rel. Ab. (%) | N     | Rel. Ab. (%) | N     | Rel. Ab. (%) | N                      | Rel. Ab. (%) | N    | Layer Prop. (%) I/S | R | Rel. Ab. (%) | N                        | Layer Prop. (%) I/S     | R |
| MRS      | 22           | 14-40 | 40           | 10-25 | 15           | 4-19 (AD)<br>5-12 (EG) | -            | -    | -                   | - | 23           | 10-25 (AD)<br>4-19 (EG)  | 92/8<br>90/10           | 3 |
|          |              |       |              |       | <b>22</b>    |                        | -            | -    | -                   | - | <b>34</b>    |                          |                         |   |
| Sediment | 13           | 12-25 | 31           | 22-38 | 22           | 7-11 (AD)<br>5-19 (EG) | 13           | 4-10 | 35/65               | 0 | 21           | 11-20 (AD)<br>11-16 (EG) | 91/9 (AD)<br>88/12 (EG) | 3 |

Rel. Ab., relative abundance; N, number of layers in coherent scattering domain with a lognormal distribution; Layer Prop., layer proportion in the I-S MLM; R, Reichweite parameter; AD, air dry; EG; ethylene-glycol.

We cannot compare the initial results at constant volume due to changes in the reactivity of diagenetic clay fraction, which is indicated by the concentrated detrital fraction (mica + chlorite, 62%) in the MRS relative to the sediments (44%). Therefore, bold relative abundances correspond to the calculated diagenetic fraction where the proportions of insoluble detrital components in the MRS are considered unchanged relative to the sediments (*i.e.*, 44%). The transformation from R0 to R3 I-S MLM as well as intense dissolution in the MRS represent the reactive clay fraction.

## Supplementary references

1. Taylor, S. R. & McLennan, S. M. Chemical Composition and Element Distribution in the Earth's Crust. in *Encyclopedia of Physical Science and Technology* (ed. Roberts, A. M.) 697–719 (Academic Press, 2001).
2. Środoń, J. & Eberl, D. D. Illite. in *Review in Mineralogy 13, Micas* (ed. Bailey, S. W.) 495–544 (Mineralogical Society of America, 1984).
3. Horie, K., Hidaka, H. & Gauthier-Lafaye, F. U-Pb geochronology and geochemistry of zircon from the Franceville series at Bidoudouma, Gabon. *The 15th Annual Goldschmidt Conference* (2005).
4. Bros, R., Stille, P., Gauthier-Lafaye, F., Weber, F. & Clauer, N. Sm-Nd isotopic dating of Proterozoic clay material: an example from the Francevillian sedimentary series, Gabon. *Earth Planet. Sci. Lett.* **113**, 207–218 (1992).
5. Gancarz, A. J. U-Pb age ( $2.05 \times 10^9$  years) of the Oklo uranium deposit. *The Natural Fission Reactors: Annual International Atomic Energy Agency Conference* (1978).
6. Mouélé, I. M. *et al.* 2.9–1.9 Ga paleoalterations of Archean granitic basement of the Franceville basin (Gabon). *J. Afr. Earth Sci.* **97**, 244–260 (2014).
7. Gauthier-Lafaye, F. & Weber, F. Natural nuclear fission reactors: time constraints for occurrence, and their relation to uranium and manganese deposits and to the evolution of the atmosphere. *Precambrian Res.* **120**, 81–100 (2003).
8. El Albani, A. *et al.* Large colonial organisms with coordinated growth in oxygenated environments 2.1 Gyr ago. *Nature* **466**, 100–104 (2010).
9. El Albani, A. *et al.* The 2.1 Ga Old Francevillian Biota: Biogenicity, Taphonomy and Biodiversity. *PLoS ONE* **9**, e99438 (2014).
10. Billault, V., Beaufort, D., Patrier, P. & Petit, S. Crystal chemistry of Fe-sudoites from uranium deposits in the Athabasca basin (Saskatchewan, Canada). *Clays Clay Miner.* **50**, 70–81 (2002).
11. Aubineau, J. *et al.* Unusual microbial mat-related structural diversity 2.1 billion years ago and implications for the Francevillian biota. *Geobiology* **16**, 476–497 (2018).
